# Supplementary material
Source: publisher site journal article supplement (https://www.spandidos-publications.com/1396/downloadSupplementary)

Figure S1. Hematoxylin and eosin staining of liver tumors in DEN-induced rats. (A) Hemorrhage was observed in the DEN group, indicated with black arrow. (B) DEN treatment induced necrosis (black asterisk). (C) Pseudoadenoid structures were found in the DEN group (black arrowhead). The red asterisk indicates healthy liver tissue, # represents small vessels and the green asterisk represents bile duct. (D) Red arrow indicates hepatic sinus dilation in the DEN group. DEN, diethylnitrosamine.

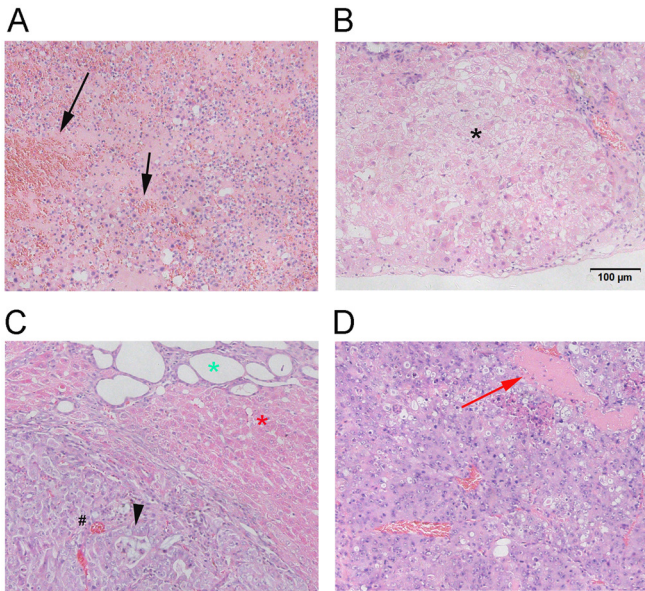

Supplement: Supplementary file 1 [file downloadSupplementary]
